# Supplementary material
Source: MDPI journal article supplement (https://www.mdpi.com/search?q=molbank-2021-M1182)
Supplement: s001 [file molbank-2021-M1182-s001.pdf]

## *Supporting Information*

### ***Cis*-Bis(2,2'-azopyridinido)dicarbonylruthenium(II)**

Tsugiko Takase\*, Shuya Kainuma, Takatoshi Kanno, Dai Oyama\*

#### **Table of Contents**

|           |        |
|-----------|--------|
| Figure S1 | page 2 |
| Figure S2 | page 3 |

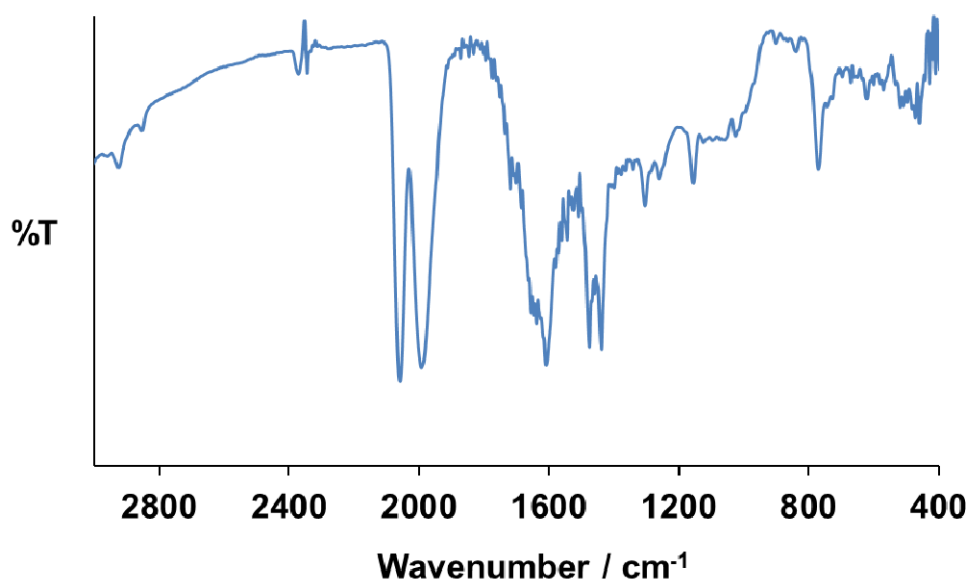

**Figure S1.** The IR spectrum of  $[\text{Ru}(\text{apy}\cdot^-)_2(\text{CO})_2]$  (KBr method).

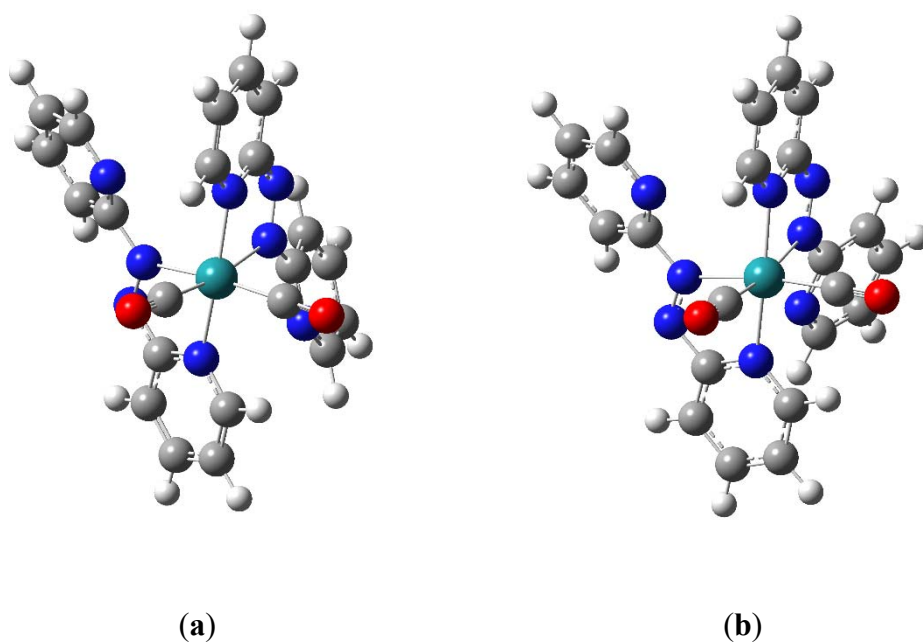

**Figure S2.** Optimized structures of (a):  $[\text{Ru}(\text{apy}\cdot^-)_2(\text{CO})_2]$ ; (b)  $[\text{Ru}(\text{apy})_2(\text{CO})_2]^{2+}$  (in MeOH).
